# Supplementary material
Source: Springer Nature journal article supplement (https://www.springermedizin.de/resource/supplementary/12879_2011_1584_MOESM6_ESM.pdf/9442858)

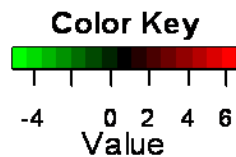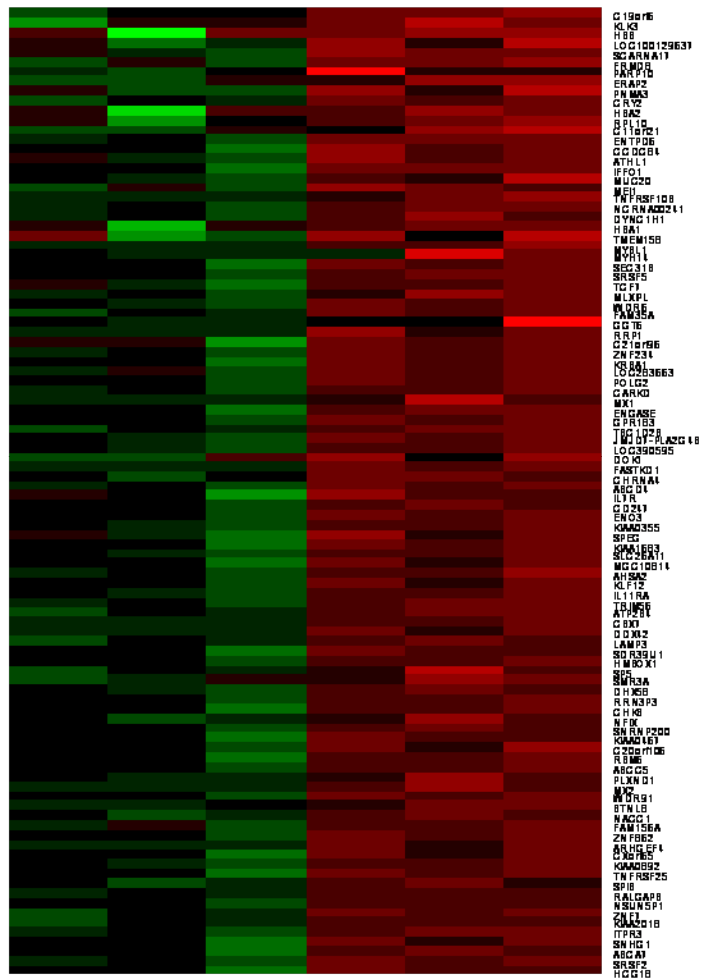

Styphnii\_A1

Styphnii\_A6

Styphnii\_A11

Styphnii\_C1

Styphnii\_C9

Styphnii\_C11

Supplement: MOESM6 [file 9442858]
